# Supplementary material for: Network Modeling of microRNA–mRNA Interactions in Neuroblastoma Tumorigenesis Identifies miR-204 as a Direct Inhibitor of MYCN
Source: Oxford University Press journal article supplement (doi:10.1158/0008-5472.can-17-3034), 2018-04-02
Supplement: 00085472can173034-sup-190273_3_supp_4636630_p5xlq6.xlsx [file 00085472can173034-sup-190273_3_supp_4636630_p5xlq6.xlsx]

## Sheet: Supplementary Table 2-1
	miRNA	mRNA	EdgeScore	PScore	pvalue	Correlation	Correlation_rawp	Correlation_adjp
1	mmu-miR-106a	PLEKHO2	0.6895	-12732.2	0	-0.740119	8.39e-05	0.000404006
2	mmu-miR-106a	SLC46A1	0.6895	-16125.5	0	-0.721344	0.000155594	0.000591424
3	mmu-miR-106a	RTN4RL1	0.6845	-12729.3	0	-0.8083	4.25e-06	6.61e-05
4	mmu-miR-106a	LAYN	0.6845	-12729.3	0	-0.727273	0.000128923	0.000525029
5	mmu-miR-106a	KCNQ3	0.6845	-12729.3	0	-0.738142	8.98e-05	0.000419847
6	mmu-miR-106a	PSD3	0.6095	-12729.5	0	-0.670949	0.00062993	0.00155936
7	mmu-miR-106a	LSAMP	0.609	-12729.5	0	-0.684783	0.000442408	0.0012072
8	mmu-miR-106a	CREB3L2	0.57	-12735.8	0	-0.809289	4.04e-06	6.46e-05
9	mmu-miR-106a	NXN	0.562	-12785.5	0	-0.797431	7.39e-06	8.69e-05
10	mmu-miR-106a	TTPAL	0.558	-12742.5	0	-0.752964	5.27e-05	0.000300146
11	mmu-miR-106a	C1QTNF7	0.558	-12742.5	0	-0.756917	4.53e-05	0.000273223
12	mmu-miR-106a	PHYHIP	0.556	-12769.4	0	-0.688735	0.000398414	0.0011192
13	mmu-miR-106a	TAF9B	0.556	-12769.4	0	-0.724308	0.000141739	0.000556906
14	mmu-miR-106a	SLC35F1	0.556	-12769.4	0	-0.714427	0.00019235	0.000682038
15	mmu-miR-106a	LAYN	0.5555	-12784.6	0	-0.733202	0.000106157	0.000462181
16	mmu-miR-106a	MGLL	0.5525	-12740.4	0	-0.688735	0.000398414	0.0011192
17	mmu-miR-106a	SLC35F3	0.552	-12740.4	0	-0.712451	0.000204086	0.000710439
18	mmu-miR-106a	SLC35F3	0.552	-12740.4	0	-0.634387	0.00147238	0.00293986
19	mmu-miR-106a	ATRNL1	0.552	-12740.4	0	-0.647233	0.00110654	0.00236273
20	mmu-miR-106a	RAB3B	0.552	-12740.4	0	-0.695652	0.00033024	0.000986933
21	mmu-miR-106a	SOCS6	0.5445	-12791	0	-0.497036	0.0169678	0.0213086
22	mmu-miR-106b	PEAR1	0.5595	-12752.4	0	-0.755929	4.71e-05	0.000279315
23	mmu-miR-106b	CHRM2	0.552	-12740.4	0	-0.676877	0.000542718	0.00139564
24	mmu-miR-106b	OLFM1	0.552	-12740.4	0	-0.601779	0.00288516	0.00492735
25	mmu-miR-135a	SMAD9	0.814	-12761.8	0	-0.780632	1.67e-05	0.000144213
26	mmu-miR-135a	COL4A3	0.7185	-12780.5	0	-0.575099	0.0047667	0.00734893
27	mmu-miR-135a	PURA	0.6375	-15925.2	0	-0.606719	0.00261715	0.00456032
28	mmu-miR-135a	CAPN5	0.6215	-12794	0	-0.774704	2.18e-05	0.000168982
29	mmu-miR-135a	CASZ1	0.5905	-12785.4	0	-0.758893	4.2e-05	0.00026061
30	mmu-miR-135a	CAPN5	0.59	-12794	0	-0.661067	0.000801459	0.00185802
31	mmu-miR-135a	FMN1	0.59	-12794	0	-0.770751	2.58e-05	0.000187864
32	mmu-miR-135a	NETO1	0.5855	-12785.4	0	-0.562253	0.00598818	0.00884309
33	mmu-miR-135a	PARVA	0.5855	-12785.4	0	-0.763834	3.45e-05	0.000227517
34	mmu-miR-135a	SLC35F1	0.5855	-12785.4	0	-0.643281	0.00120984	0.00253346
35	mmu-miR-135a	SOCS6	0.585	-12768.5	0	-0.539526	0.00879148	0.0121388
36	mmu-miR-135a	PSD3	0.581	-12796	0	-0.761858	3.73e-05	0.0002413
37	mmu-miR-135a	MAGT1	0.576	-12778.7	0	-0.685771	0.000431045	0.00118488
38	mmu-miR-135a	IFLTD1	0.5745	-12794.2	0	-0.544466	0.00810389	0.0113559
39	mmu-miR-135a	CLU	0.5495	-12788.4	0	-0.895257	3.18e-06	5.98e-05
40	mmu-miR-135a	MRGPRF	0.5335	-12794.2	0.0013	-0.742095	7.83e-05	0.000386831
41	mmu-miR-135a	KCNQ3	0.5315	-12796	0.0023	-0.670949	0.00062993	0.00155936
42	mmu-miR-135a	ATP2B4	0.5315	-12796	0.0023	-0.843874	1.75e-06	5.95e-05
43	mmu-miR-135b	ROPN1L	0.6595	-16380.4	0	-0.674901	0.000570581	0.00144964
44	mmu-miR-135b	GULP1	0.657	-16043.8	0	-0.800395	6.35e-06	8.06e-05
45	mmu-miR-135b	ARHGEF9	0.587	-13357.5	0	-0.659091	0.000840101	0.00191971
46	mmu-miR-135b	IGSF11	0.554	-17927.1	0	-0.800395	6.35e-06	8.06e-05
47	mmu-miR-148a	SLC46A1	0.6895	-16125.5	0	-0.843874	1.75e-06	5.95e-05
48	mmu-miR-148a	ATP2B4	0.6845	-12729.3	0	-0.913043	3.32e-06	5.98e-05
49	mmu-miR-148a	WNT10A	0.6635	-12789.9	0	-0.618577	0.00205824	0.00378296
50	mmu-miR-148a	PSD3	0.6095	-12729.5	0	-0.811265	3.67e-06	6.24e-05
51	mmu-miR-148a	CLU	0.6025	-12746.6	0	-0.850791	1.89e-06	5.95e-05
52	mmu-miR-148a	SH2B3	0.574	-17587.6	0	-0.849802	1.86e-06	5.95e-05
53	mmu-miR-148a	ADAM23	0.57	-12735.8	0	-0.844862	1.76e-06	5.95e-05
54	mmu-miR-148a	ITFG3	0.5635	-12750.2	0	-0.812253	3.5e-06	6.1e-05
55	mmu-miR-148a	RPH3A	0.5635	-12750.2	0	-0.835968	1.72e-06	5.95e-05
56	mmu-miR-148a	PDE11A	0.562	-12785.5	0	-0.749012	6.11e-05	0.000330123
57	mmu-miR-148a	NECAB1	0.56	-12796	0	-0.698617	0.000304176	0.000931845
58	mmu-miR-148a	TNXB	0.5595	-12752.4	0	-0.773715	2.27e-05	0.000174208
59	mmu-miR-148a	TTPAL	0.558	-12742.5	0	-0.748024	6.33e-05	0.000336919
60	mmu-miR-148a	CASZ1	0.5565	-12769.4	0	-0.76581	3.18e-05	0.000215677
61	mmu-miR-148a	PHYHIP	0.556	-12769.4	0	-0.690711	0.000377832	0.0010812
62	mmu-miR-148a	FGF1	0.5555	-12784.6	0	-0.759881	4.04e-05	0.00025369
63	mmu-miR-148a	ANKRD29	0.5545	-12757.5	0	-0.717391	0.000175802	0.000642605
64	mmu-miR-148a	SLC35F3	0.552	-12740.4	0	-0.708498	0.000229355	0.000765334
65	mmu-miR-148a	PCDH7	0.552	-12740.4	0	-0.647233	0.00110654	0.00236273
66	mmu-miR-148a	SLC35F3	0.552	-12740.4	0	-0.664032	0.00074631	0.00175887
67	mmu-miR-148a	CCDC85A	0.552	-12740.4	0	-0.629447	0.00163795	0.00318106
68	mmu-miR-148a	AGBL4	0.552	-12740.4	0	-0.879447	2.82e-06	5.95e-05
69	mmu-miR-148a	SOCS6	0.5445	-12791	0	-0.532609	0.00983525	0.0133349
70	mmu-miR-17	STOM	0.5545	-12757.5	0	-0.712451	0.000204086	0.000710439
71	mmu-miR-17	SNX21	0.552	-12740.4	0	-0.721344	0.000155594	0.000591424
72	mmu-miR-18a	ABTB2	0.8865	-13083.9	0	-0.677866	0.000529221	0.00137358
73	mmu-miR-18a	GLT25D2	0.8865	-13134.8	0	-0.797431	7.39e-06	8.69e-05
74	mmu-miR-18a	MAPK12	0.8865	-13083.9	0	-0.616601	0.00214367	0.00390508
75	mmu-miR-18a	PTPRE	0.8865	-13083.9	0	-0.795455	8.16e-06	9.24e-05
76	mmu-miR-18a	MMP2	0.886	-13151.2	0	-0.625494	0.00178148	0.00339319
77	mmu-miR-18a	CD151	0.886	-13151.2	0	-0.637352	0.00137999	0.00279467
78	mmu-miR-18a	RAB11FIP5	0.8835	-13078.1	0	-0.79249	9.46e-06	0.000101166
79	mmu-miR-18a	SLC2A3	0.8685	-13066.5	0	-0.635375	0.00144102	0.00289129
80	mmu-miR-18a	NTRK2	0.8685	-13066.5	0	-0.753953	5.08e-05	0.000292766
81	mmu-miR-18a	AAK1	0.8655	-13066.8	0	-0.651186	0.00101078	0.0022065
82	mmu-miR-18a	CD151	0.782	-14684.5	0	-0.768775	2.81e-05	0.00019946
83	mmu-miR-18a	CADM2	0.782	-14684.5	0	-0.844862	1.76e-06	5.95e-05
84	mmu-miR-18a	MDGA1	0.7615	-13407.8	0	-0.583004	0.00412476	0.00654517
85	mmu-miR-18a	MYLIP	0.761	-14170.9	0	-0.660079	0.000820588	0.00189171
86	mmu-miR-18a	RGS3	0.7455	-14101.6	0	-0.541502	0.00851083	0.0118202
87	mmu-miR-18a	SMAD9	0.74	-12765.6	0	-0.771739	2.48e-05	0.000183662
88	mmu-miR-18a	BDH2	0.722	-15080.7	0	-0.66502	0.000728653	0.00172715
89	mmu-miR-18a	LYSMD2	0.7065	-12786	0	-0.729249	0.000120924	0.000504282
90	mmu-miR-18a	NEBL	0.7035	-14630.9	0	-0.736166	9.61e-05	0.000439141
91	mmu-miR-18a	GUCY1A3	0.7015	-12600.2	0	-0.856719	2.06e-06	5.95e-05
92	mmu-miR-18a	FGF14	0.6825	-13106.1	0	-0.820158	2.47e-06	5.95e-05
93	mmu-miR-18a	REXO2	0.6795	-12904.2	0	-0.713439	0.000198146	0.000696898
94	mmu-miR-18a	SNTG2	0.6795	-12904.2	0	-0.700593	0.000287775	0.000895643
95	mmu-miR-18a	RGS3	0.678	-13267.8	0	-0.673913	0.000584958	0.00147943
96	mmu-miR-18a	EPAS1	0.6775	-13145.3	0	-0.640316	0.00129255	0.00266174
97	mmu-miR-18a	PACSIN3	0.674	-13196.2	0	-0.506917	0.0146572	0.0187873
98	mmu-miR-18a	EMP2	0.6725	-14114.2	0	-0.829051	1.88e-06	5.95e-05
99	mmu-miR-18a	GPRIN3	0.672	-14008.3	0	-0.837945	1.71e-06	5.95e-05
100	mmu-miR-18a	DUSP3	0.6685	-13958.5	0	-0.69664	0.000321353	0.0009674
101	mmu-miR-18a	MID2	0.6415	-12723.7	0	-0.708498	0.000229355	0.000765334
102	mmu-miR-18a	ARSA	0.635	-12910.8	0	-0.579051	0.00443597	0.00695848
103	mmu-miR-18a	UHMK1	0.634	-13261.2	0	-0.655138	0.000922116	0.0020619
104	mmu-miR-18a	SYT7	0.625	-13215.9	0	-0.522727	0.0115036	0.0152477
105	mmu-miR-18a	ICAM2	0.621	-12442.6	0	-0.590909	0.00355715	0.00581329
106	mmu-miR-18a	SLC6A17	0.6175	-12374.7	0	-0.781621	1.59e-05	0.00014012
107	mmu-miR-18a	PAG1	0.6135	-15885.7	0	-0.683794	0.000454022	0.00122945
108	mmu-miR-18a	ARHGAP5	0.612	-12854.8	0	-0.608696	0.00251599	0.00442949
109	mmu-miR-18a	WFIKKN2	0.612	-15652.9	0	-0.701581	0.000279856	0.000876582
110	mmu-miR-18a	WFIKKN2	0.611	-15906.2	0	-0.576087	0.00468214	0.00725722
111	mmu-miR-18a	SCRN1	0.6045	-12322.2	0	-0.714427	0.00019235	0.000682038
112	mmu-miR-18a	VAT1L	0.6045	-12322.2	0	-0.755929	4.71e-05	0.000279315
113	mmu-miR-18a	ZCCHC24	0.6015	-12367.2	0	-0.761858	3.73e-05	0.0002413
114	mmu-miR-18a	ZCCHC24	0.6015	-12367.2	0	-0.785573	1.32e-05	0.000123947
115	mmu-miR-18a	UHMK1	0.6015	-12367.2	0	-0.733202	0.000106157	0.000462181
116	mmu-miR-18a	SPRY3	0.6005	-13400.2	0	-0.717391	0.000175802	0.000642605
117	mmu-miR-18a	PURB	0.5965	-12592.5	0	-0.754941	4.89e-05	0.000285328
118	mmu-miR-18a	LRRC55	0.595	-14867.8	0	-0.712451	0.000204086	0.000710439
119	mmu-miR-18a	ENDOD1	0.593	-12785.8	0	-0.662055	0.000782707	0.00182429
120	mmu-miR-18a	ZBTB4	0.5925	-13258.1	0	-0.72332	0.000146238	0.000567736
121	mmu-miR-18a	GNG12	0.592	-12244.3	0	-0.738142	8.98e-05	0.000419847
122	mmu-miR-18a	SGCD	0.5895	-12325.2	0	-0.789526	1.09e-05	0.000110543
123	mmu-miR-18a	TRIM14	0.5895	-15040	0	-0.631423	0.00156993	0.00308654
124	mmu-miR-18a	NCEH1	0.587	-12209	0	-0.66996	0.000645553	0.00158898
125	mmu-miR-18a	COL5A2	0.587	-12358.7	0	-0.752964	5.27e-05	0.000300146
126	mmu-miR-18a	ABCB9	0.5865	-12238.2	0	-0.781621	1.59e-05	0.00014012
127	mmu-miR-18a	MPZL2	0.5795	-12777	0	-0.511858	0.0136032	0.0175979
128	mmu-miR-18a	MBNL2	0.578	-12590.4	0	-0.675889	0.000556503	0.00142126
129	mmu-miR-18a	GALNT14	0.578	-11402.2	0	-0.456522	0.0297831	0.0351222
130	mmu-miR-18a	ABCD2	0.5745	-13140.1	0	-0.533597	0.00968012	0.0131566
131	mmu-miR-18a	PABPC5	0.5735	-15047.3	0	-0.703557	0.000264563	0.000842183
132	mmu-miR-18a	ZDHHC2	0.5705	-12286.7	0	-0.655138	0.000922116	0.0020619
133	mmu-miR-18a	SGMS2	0.5705	-12286.7	0	-0.767787	2.93e-05	0.000206029
134	mmu-miR-18a	AGPAT2	0.57	-12330.3	0	-0.639328	0.00132117	0.00270286
135	mmu-miR-18a	RHOJ	0.57	-12330.3	0	-0.481225	0.021282	0.0259873
136	mmu-miR-18a	CSRP1	0.5695	-12366	0	-0.806324	4.69e-06	6.91e-05
137	mmu-miR-18a	TMEM117	0.5655	-12383.4	0	-0.726285	0.000133083	0.000535553
138	mmu-miR-18a	SERPINB9	0.5655	-12383.4	0	-0.697628	0.000312666	0.000950401
139	mmu-miR-18a	FAM70A	0.565	-12656.1	0	-0.561265	0.0060921	0.00896269
140	mmu-miR-18a	CCNC	0.564	-11308.6	0	-0.606719	0.00261715	0.00456032
141	mmu-miR-18a	WWTR1	0.562	-11587.2	0	-0.521739	0.0116826	0.0154509
142	mmu-miR-18a	KCTD16	0.5515	-13686.8	0	-0.455534	0.030173	0.0355285
143	mmu-miR-18a	ODZ1	0.5515	-12994.5	0	-0.576087	0.00468214	0.00725722
144	mmu-miR-18a	PHF15	0.546	-11453.8	0	-0.505929	0.0148759	0.0190239
145	mmu-miR-18a	PQLC3	0.545	-11200.6	0	-0.79249	9.46e-06	0.000101166
146	mmu-miR-18a	KCNN3	0.54	-11692.6	0.0002	-0.797431	7.39e-06	8.69e-05
147	mmu-miR-18a	ADD3	0.5305	-11290.2	0.003	-0.554348	0.00686275	0.00986796
148	mmu-miR-18a	REPS2	0.5285	-11928.2	0.0051	-0.458498	0.0290154	0.0342893
149	mmu-miR-18a	STXBP5L	0.5275	-10873.4	0.0065	-0.729249	0.000120924	0.000504282
150	mmu-miR-18a	KCNJ10	0.5235	-13233.9	0.0168	-0.754941	4.89e-05	0.000285328
151	mmu-miR-18a	PSD3	0.523	-11064.4	0.0188	-0.799407	6.68e-06	8.27e-05
152	mmu-miR-18a	DLC1	0.522	-11132.3	0.0233	-0.604743	0.00272172	0.00470268
153	mmu-miR-18a	GLRB	0.5195	-10908	0.0386	-0.762846	3.59e-05	0.000234425
154	mmu-miR-19a	PLEKHO2	0.6895	-12732.2	0	-0.537549	0.00907981	0.012473
155	mmu-miR-19a	KCNQ3	0.6845	-12729.3	0	-0.534585	0.00952703	0.0129914
156	mmu-miR-19a	PSD3	0.6095	-12729.5	0	-0.605731	0.002669	0.00462694
157	mmu-miR-19a	LSAMP	0.609	-12729.5	0	-0.450593	0.0321852	0.0376763
158	mmu-miR-19a	ITFG3	0.5635	-12750.2	0	-0.535573	0.00937597	0.0128078
159	mmu-miR-19a	RPH3A	0.5635	-12750.2	0	-0.536561	0.0092269	0.0126395
160	mmu-miR-19a	SYNM	0.5605	-12787.1	0	-0.562253	0.00598818	0.00884309
161	mmu-miR-19a	CASZ1	0.5565	-12769.4	0	-0.66996	0.000645553	0.00158898
162	mmu-miR-19a	SLC35F1	0.556	-12769.4	0	-0.556324	0.00663468	0.00959652
163	mmu-miR-19a	ANKRD29	0.5545	-12757.5	0	-0.433794	0.0398482	0.0458298
164	mmu-miR-19a	SHC3	0.5525	-12740.4	0	-0.450593	0.0321852	0.0376763
165	mmu-miR-19a	CAPN5	0.552	-12740.4	0	-0.597826	0.0031159	0.00523448
166	mmu-miR-19a	NAPB	0.552	-12740.4	0	-0.626482	0.00174464	0.0033393
167	mmu-miR-19a	AGBL4	0.552	-12740.4	0	-0.684783	0.000442408	0.0012072
168	mmu-miR-19a	SYN1	0.552	-12740.4	0	-0.447628	0.0334434	0.0390382
169	mmu-miR-19a	TMEM132E	0.552	-12740.4	0	-0.606719	0.00261715	0.00456032
170	mmu-miR-19a	FMN1	0.552	-12740.4	0	-0.634387	0.00147238	0.00293986
171	mmu-miR-19a	SMAD9	0.5285	-12792.4	0.0051	-0.804348	5.19e-06	7.31e-05
172	mmu-miR-19b	PARVA	0.556	-12769.4	0	-0.626482	0.00174464	0.0033393
173	mmu-miR-204	SIX2	1	-12725.7	0	-0.630435	0.00160363	0.00312607
174	mmu-miR-204	DLGAP2	1	-12725.7	0	-0.794466	8.58e-06	9.53e-05
175	mmu-miR-204	SETBP1	0.8035	-12725.9	0	-0.493083	0.0179722	0.0224008
176	mmu-miR-204	TANC2	0.8035	-12725.9	0	-0.753953	5.08e-05	0.000292766
177	mmu-miR-204	IGF2BP3	0.6935	-16055.4	0	-0.822134	2.29e-06	5.95e-05
178	mmu-miR-204	PIK3R1	0.6895	-12732.2	0	-0.534585	0.00952703	0.0129914
179	mmu-miR-204	EARS2	0.6895	-12732.2	0	-0.651186	0.00101078	0.0022065
180	mmu-miR-204	DLGAP2	0.6895	-12732.2	0	-0.645257	0.00115722	0.00245085
181	mmu-miR-204	SLC38A1	0.6895	-12732.2	0	-0.698617	0.000304176	0.000931845
182	mmu-miR-204	ELAVL1	0.686	-12729.3	0	-0.676877	0.000542718	0.00139564
183	mmu-miR-204	MEX3A	0.6845	-12729.3	0	-0.796443	7.76e-06	8.98e-05
184	mmu-miR-204	BCL11A	0.6845	-12729.3	0	-0.741107	8.11e-05	0.000394964
185	mmu-miR-204	PHF21B	0.6845	-12729.3	0	-0.746047	6.8e-05	0.000352113
186	mmu-miR-204	ACVR2B	0.6845	-12729.3	0	-0.794466	8.58e-06	9.53e-05
187	mmu-miR-204	SH3BP2	0.6845	-12729.3	0	-0.833992	1.74e-06	5.95e-05
188	mmu-miR-204	MEIS2	0.6845	-12729.3	0	-0.807312	4.46e-06	6.68e-05
189	mmu-miR-204	RPS6KC1	0.6845	-12729.3	0	-0.715415	0.000186696	0.000666222
190	mmu-miR-204	CDC25A	0.6845	-12729.3	0	-0.649209	0.00105775	0.00228161
191	mmu-miR-204	FAM122B	0.6845	-12729.3	0	-0.741107	8.11e-05	0.000394964
192	mmu-miR-204	TMEM44	0.6755	-16477.4	0	-0.732213	0.000109701	0.000473391
193	mmu-miR-204	CCDC50	0.61	-17122.3	0	-0.721344	0.000155594	0.000591424
194	mmu-miR-204	EYA4	0.6095	-12729.5	0	-0.709486	0.000222806	0.000752802
195	mmu-miR-204	NUSAP1	0.609	-12729.5	0	-0.743083	7.56e-05	0.000380811
196	mmu-miR-204	FUT9	0.609	-12729.5	0	-0.623518	0.00185714	0.00350568
197	mmu-miR-204	EPHA7	0.6025	-12746.6	0	-0.745059	7.05e-05	0.000361716
198	mmu-miR-204	CELF1	0.6025	-12746.6	0	-0.668972	0.000661501	0.00161804
199	mmu-miR-204	HIPK2	0.595	-12737	0	-0.73419	0.000102708	0.000455801
200	mmu-miR-204	CREBZF	0.5945	-12737	0	-0.48419	0.0204113	0.0250729
201	mmu-miR-204	KALRN	0.576	-17594.6	0	-0.786561	1.26e-05	0.000119675
202	mmu-miR-204	NPAS3	0.575	-17638.5	0	-0.853755	1.97e-06	5.95e-05
203	mmu-miR-204	SLC38A1	0.57	-12735.8	0	-0.706522	0.000242937	0.000795038
204	mmu-miR-204	BCL11A	0.57	-12735.8	0	-0.748024	6.33e-05	0.000336919
205	mmu-miR-204	PROX1	0.57	-12735.8	0	-0.773715	2.27e-05	0.000174208
206	mmu-miR-204	PLEKHA5	0.57	-12735.8	0	-0.703557	0.000264563	0.000842183
207	mmu-miR-204	ERBB4	0.5685	-12784	0	-0.728261	0.00012487	0.000514424
208	mmu-miR-204	TTLL2	0.5665	-12750.2	0	-0.780632	1.67e-05	0.000144213
209	mmu-miR-204	FUT9	0.5665	-12750.2	0	-0.73419	0.000102708	0.000455801
210	mmu-miR-204	LIN7A	0.5635	-12750.2	0	-0.497036	0.0169678	0.0213086
211	mmu-miR-204	ZCCHC8	0.5635	-12750.2	0	-0.579051	0.00443597	0.00695848
212	mmu-miR-204	TMPO	0.5635	-12750.2	0	-0.770751	2.58e-05	0.000187864
213	mmu-miR-204	GEN1	0.5635	-12750.2	0	-0.73419	0.000102708	0.000455801
214	mmu-miR-204	MDM1	0.5635	-12750.2	0	-0.587945	0.00376175	0.00606647
215	mmu-miR-204	ARHGAP11A	0.5635	-12750.2	0	-0.744071	7.3e-05	0.000371769
216	mmu-miR-204	MDC1	0.5635	-12750.2	0	-0.599802	0.00299866	0.00507791
217	mmu-miR-204	HLF	0.5635	-12750.2	0	-0.750988	5.68e-05	0.000315606
218	mmu-miR-204	RBL1	0.5635	-12750.2	0	-0.746047	6.8e-05	0.000352113
219	mmu-miR-204	IGFBPL1	0.5635	-12750.2	0	-0.810277	3.85e-06	6.46e-05
220	mmu-miR-204	NIN	0.5635	-12750.2	0	-0.640316	0.00129255	0.00266174
221	mmu-miR-204	ELOVL2	0.5635	-12750.2	0	-0.694664	0.000339333	0.0010026
222	mmu-miR-204	ARHGAP11A	0.5635	-12750.2	0	-0.662055	0.000782707	0.00182429
223	mmu-miR-204	IER5L	0.5635	-12750.2	0	-0.814229	3.18e-06	5.98e-05
224	mmu-miR-204	CNR1	0.5635	-12750.2	0	-0.640316	0.00129255	0.00266174
225	mmu-miR-204	TOX3	0.5635	-12750.2	0	-0.778656	1.83e-05	0.000151926
226	mmu-miR-204	TOX3	0.5635	-12750.2	0	-0.782609	1.52e-05	0.000136294
227	mmu-miR-204	CCDC34	0.5635	-12750.2	0	-0.729249	0.000120924	0.000504282
228	mmu-miR-204	N4BP2	0.5635	-12750.2	0	-0.812253	3.5e-06	6.1e-05
229	mmu-miR-204	G2E3	0.5635	-12750.2	0	-0.76581	3.18e-05	0.000215677
230	mmu-miR-204	G2E3	0.5635	-12750.2	0	-0.725296	0.000137354	0.000546272
231	mmu-miR-204	TMEM44	0.5635	-12750.2	0	-0.783597	1.45e-05	0.000132574
232	mmu-miR-204	ILF2	0.5635	-12750.2	0	-0.748024	6.33e-05	0.000336919
233	mmu-miR-204	TIGD3	0.562	-12785.5	0	-0.712451	0.000204086	0.000710439
234	mmu-miR-204	MYO19	0.5605	-12787.1	0	-0.809289	4.04e-06	6.46e-05
235	mmu-miR-204	SERBP1	0.5595	-12752.4	0	-0.538538	0.00893468	0.0123104
236	mmu-miR-204	PRIMA1	0.5595	-12752.4	0	-0.672925	0.000599638	0.00150681
237	mmu-miR-204	CENPP	0.5595	-12752.4	0	-0.551383	0.00721713	0.0102904
238	mmu-miR-204	HMGN2	0.5595	-12752.4	0	-0.762846	3.59e-05	0.000234425
239	mmu-miR-204	NCAN	0.5595	-12752.4	0	-0.714427	0.00019235	0.000682038
240	mmu-miR-204	RBM14	0.558	-12742.5	0	-0.748024	6.33e-05	0.000336919
241	mmu-miR-204	NFRKB	0.558	-12742.5	0	-0.632411	0.00153682	0.00303827
242	mmu-miR-204	SUMO2	0.558	-12742.5	0	-0.55336	0.00697922	0.0100115
243	mmu-miR-204	SUMO2	0.558	-12742.5	0	-0.600791	0.00294145	0.00500271
244	mmu-miR-204	PLCG1	0.558	-12742.5	0	-0.555336	0.00674791	0.00973687
245	mmu-miR-204	TMEM44	0.558	-12742.5	0	-0.738142	8.98e-05	0.000419847
246	mmu-miR-204	HN1L	0.558	-12742.5	0	-0.692688	0.000358149	0.00103972
247	mmu-miR-204	TRIP13	0.556	-12737.7	0	-0.791502	9.94e-06	0.000103129
248	mmu-miR-204	SLC25A13	0.556	-12769.4	0	-0.754941	4.89e-05	0.000285328
249	mmu-miR-204	FAM111A	0.556	-12769.4	0	-0.736166	9.61e-05	0.000439141
250	mmu-miR-204	TMTC4	0.556	-12769.4	0	-0.704545	0.000257183	0.000824736
251	mmu-miR-204	NCAPG	0.556	-12769.4	0	-0.784585	1.39e-05	0.000128046
252	mmu-miR-204	E2F1	0.556	-12769.4	0	-0.764822	3.31e-05	0.000221909
253	mmu-miR-204	KIF17	0.5555	-12784.6	0	-0.687747	0.000409052	0.00114047
254	mmu-miR-204	SET	0.5525	-12773.1	0	-0.640316	0.00129255	0.00266174
255	mmu-miR-204	TPX2	0.552	-12740.4	0	-0.773715	2.27e-05	0.000174208
256	mmu-miR-204	MIS18BP1	0.552	-12740.4	0	-0.720356	0.000160455	0.000603734
257	mmu-miR-204	GLCCI1	0.552	-12740.4	0	-0.62747	0.00170844	0.00328935
258	mmu-miR-204	PAPD7	0.552	-12740.4	0	-0.632411	0.00153682	0.00303827
259	mmu-miR-204	CDC25B	0.552	-12740.4	0	-0.692688	0.000358149	0.00103972
260	mmu-miR-204	TPX2	0.552	-12740.4	0	-0.8083	4.25e-06	6.61e-05
261	mmu-miR-204	TTLL4	0.552	-12740.4	0	-0.729249	0.000120924	0.000504282
262	mmu-miR-204	SMC2	0.552	-12740.4	0	-0.711462	0.000210175	0.000724213
263	mmu-miR-204	PRPF38B	0.552	-12740.4	0	-0.549407	0.00746178	0.0105794
264	mmu-miR-204	WEE1	0.552	-12740.4	0	-0.504941	0.0150973	0.0192755
265	mmu-miR-204	WDR3	0.547	-12773.2	0	-0.608696	0.00251599	0.00442949
266	mmu-miR-204	TBC1D1	0.547	-12773.2	0	-0.741107	8.11e-05	0.000394964
267	mmu-miR-204	FAM84A	0.539	-12785.1	0.0002	-0.643281	0.00120984	0.00253346
268	mmu-miR-204	AUTS2	0.532	-18380.8	0.002	-0.636364	0.00141023	0.00284705
269	mmu-miR-204	NPAS3	0.5295	-18388.4	0.0039	-0.780632	1.67e-05	0.000144213
270	mmu-miR-204	B3GNT5	0.525	-18368.9	0.0119	-0.840909	1.71e-06	5.95e-05
271	mmu-miR-204	TMEM201	0.5205	-12784.8	0.0317	-0.642292	0.0012369	0.00257838
272	mmu-miR-204	LCORL	0.5185	-12793.9	0.0468	-0.676877	0.000542718	0.00139564
273	mmu-miR-204	LUC7L2	0.5185	-18509.9	0.0468	-0.599802	0.00299866	0.00507791
274	mmu-miR-20a	PCDH7	0.552	-12740.4	0	-0.629447	0.00163795	0.00318106
275	mmu-miR-25	PSD3	0.6095	-12729.5	0	-0.795455	8.16e-06	9.24e-05
276	mmu-miR-25	CDH10	0.57	-12735.8	0	-0.721344	0.000155594	0.000591424
277	mmu-miR-25	CAT	0.5635	-12750.2	0	-0.732213	0.000109701	0.000473391
278	mmu-miR-25	PARVA	0.556	-12769.4	0	-0.732213	0.000109701	0.000473391
279	mmu-miR-25	ATRNL1	0.552	-12740.4	0	-0.721344	0.000155594	0.000591424
280	mmu-miR-25	DGKB	0.552	-12740.4	0	-0.766798	3.05e-05	0.000211636
281	mmu-miR-25	RAB3B	0.552	-12740.4	0	-0.677866	0.000529221	0.00137358
282	mmu-miR-25	SMAD9	0.5285	-12792.4	0.0051	-0.614625	0.00223208	0.00403043
283	mmu-miR-298	WNT10A	0.8645	-12775.5	0	-0.73419	0.000102708	0.000455801
284	mmu-miR-298	RASSF4	0.8045	-12784.7	0	-0.679842	0.000503073	0.00132687
285	mmu-miR-298	NACC2	0.7345	-12790.2	0	-0.598814	0.00305681	0.00515404
286	mmu-miR-298	ELL2	0.7165	-12658.1	0	-0.664032	0.00074631	0.00175887
287	mmu-miR-298	ETV1	0.7145	-12659.8	0	-0.751976	5.47e-05	0.000307906
288	mmu-miR-298	ABCD2	0.698	-12477.2	0	-0.560277	0.00619754	0.00908701
289	mmu-miR-298	MDGA1	0.697	-12403.6	0	-0.43083	0.0413402	0.0474411
290	mmu-miR-298	GPR158	0.695	-12769.9	0	-0.729249	0.000120924	0.000504282
291	mmu-miR-298	FAIM2	0.687	-12518.5	0	-0.682806	0.000465891	0.00125463
292	mmu-miR-298	PDE8B	0.6855	-12586.1	0	-0.630435	0.00160363	0.00312607
293	mmu-miR-298	IQSEC1	0.6755	-12597.3	0	-0.804348	5.19e-06	7.31e-05
294	mmu-miR-298	MYO1D	0.672	-12754.9	0	-0.666008	0.000711349	0.00169954
295	mmu-miR-298	FOSB	0.671	-12436	0	-0.624506	0.00181898	0.00344864
296	mmu-miR-298	SLC6A12	0.664	-12792.7	0	-0.637352	0.00137999	0.00279467
297	mmu-miR-298	FMOD	0.6635	-13127.4	0	-0.713439	0.000198146	0.000696898
298	mmu-miR-298	LDHD	0.663	-12765.2	0	-0.59585	0.00323698	0.00539612
299	mmu-miR-298	CCPG1	0.662	-12744.7	0	-0.6917	0.00036788	0.0010601
300	mmu-miR-298	COL4A4	0.662	-12684.6	0	-0.487154	0.0195699	0.0241533
301	mmu-miR-298	GRIN2C	0.659	-12714.6	0	-0.582016	0.00420078	0.00664423
302	mmu-miR-298	ACVRL1	0.6585	-12378.9	0	-0.626482	0.00174464	0.0033393
303	mmu-miR-298	NEBL	0.654	-13148.4	0	-0.624506	0.00181898	0.00344864
304	mmu-miR-298	SH2B3	0.645	-12442.6	0	-0.664032	0.00074631	0.00175887
305	mmu-miR-298	SLC2A13	0.644	-12488.1	0	-0.73913	8.68e-05	0.000412222
306	mmu-miR-298	PDE8A	0.644	-12488.1	0	-0.748024	6.33e-05	0.000336919
307	mmu-miR-298	VDR	0.6435	-12430.6	0	-0.75	5.89e-05	0.000322111
308	mmu-miR-298	NCAM1	0.6435	-12430.6	0	-0.73419	0.000102708	0.000455801
309	mmu-miR-298	ZC3HAV1	0.643	-12457.7	0	-0.824111	2.14e-06	5.95e-05
310	mmu-miR-298	TMEM63C	0.6425	-12299	0	-0.746047	6.8e-05	0.000352113
311	mmu-miR-298	PERP	0.641	-12537.7	0	-0.828063	1.92e-06	5.95e-05
312	mmu-miR-298	LRP4	0.64	-12488	0	-0.564229	0.00578478	0.00860287
313	mmu-miR-298	KIF16B	0.64	-12488	0	-0.704545	0.000257183	0.000824736
314	mmu-miR-298	ASB1	0.638	-12510.1	0	-0.667984	0.000677779	0.00164192
315	mmu-miR-298	ABCA2	0.638	-12510.1	0	-0.646245	0.00113164	0.00240646
316	mmu-miR-298	SPATS1	0.638	-12510.1	0	-0.701581	0.000279856	0.000876582
317	mmu-miR-298	PAFAH2	0.638	-12510.1	0	-0.499012	0.0164832	0.0207835
318	mmu-miR-298	SLCO2B1	0.638	-12510.1	0	-0.722332	0.000150856	0.000579331
319	mmu-miR-298	PGM2L1	0.638	-12510.1	0	-0.804348	5.19e-06	7.31e-05
320	mmu-miR-298	SLC10A4	0.6375	-12435.8	0	-0.820158	2.47e-06	5.95e-05
321	mmu-miR-298	ZEB2	0.636	-12264.1	0	-0.658103	0.000860004	0.00195774
322	mmu-miR-298	CALR3	0.6345	-12485.8	0	-0.590909	0.00355715	0.00581329
323	mmu-miR-298	PLCL1	0.6315	-12352	0	-0.603755	0.00277531	0.00477522
324	mmu-miR-298	ZC3HAV1	0.6315	-12352	0	-0.679842	0.000503073	0.00132687
325	mmu-miR-298	NAGA	0.6305	-12429.6	0	-0.742095	7.83e-05	0.000386831
326	mmu-miR-298	GDAP1	0.63	-12390	0	-0.715415	0.000186696	0.000666222
327	mmu-miR-298	RREB1	0.63	-12390	0	-0.614625	0.00223208	0.00403043
328	mmu-miR-298	ATP2B1	0.63	-12390	0	-0.497036	0.0169678	0.0213086
329	mmu-miR-298	ANKRD42	0.6295	-12383.1	0	-0.498024	0.0167241	0.0210431
330	mmu-miR-298	KCNT1	0.6295	-12383.1	0	-0.714427	0.00019235	0.000682038
331	mmu-miR-298	MOXD1	0.627	-12422	0	-0.601779	0.00288516	0.00492735
332	mmu-miR-298	CITED4	0.627	-17111.4	0	-0.541502	0.00851083	0.0118202
333	mmu-miR-298	PITPNM3	0.627	-12320	0	-0.602767	0.00282979	0.00485612
334	mmu-miR-298	GRIN3A	0.626	-12482.6	0	-0.647233	0.00110654	0.00236273
335	mmu-miR-298	ARC	0.624	-12764.8	0	-0.551383	0.00721713	0.0102904
336	mmu-miR-298	IL34	0.6225	-12254.5	0	-0.682806	0.000465891	0.00125463
337	mmu-miR-298	COLEC11	0.6205	-11982.6	0	-0.738142	8.98e-05	0.000419847
338	mmu-miR-298	CP	0.616	-11853.8	0	-0.80336	5.46e-06	7.44e-05
339	mmu-miR-298	PGM2L1	0.615	-11883.2	0	-0.79249	9.46e-06	0.000101166
340	mmu-miR-298	ASAP3	0.615	-11883.2	0	-0.528656	0.0104766	0.0140727
341	mmu-miR-298	FAM26E	0.6135	-11853.7	0	-0.730237	0.000117082	0.000494594
342	mmu-miR-298	LUM	0.6135	-11853.7	0	-0.6917	0.00036788	0.0010601
343	mmu-miR-298	PDLIM4	0.6125	-11777.4	0	-0.70751	0.000236065	0.000779731
344	mmu-miR-298	EGFR	0.611	-11788	0	-0.44664	0.0338715	0.0394966
345	mmu-miR-298	PLEKHO2	0.611	-11788	0	-0.720356	0.000160455	0.000603734
346	mmu-miR-298	AVPI1	0.611	-11788	0	-0.702569	0.00027212	0.000859933
347	mmu-miR-298	P2RY1	0.61	-11796.7	0	-0.788538	1.15e-05	0.000113777
348	mmu-miR-298	SH3GLB2	0.61	-11705.5	0	-0.73913	8.68e-05	0.000412222
349	mmu-miR-298	ZDHHC8	0.609	-11922.3	0	-0.522727	0.0115036	0.0152477
350	mmu-miR-298	EPHA2	0.609	-11922.3	0	-0.743083	7.56e-05	0.000380811
351	mmu-miR-298	TSGA10	0.609	-11922.3	0	-0.495059	0.0174641	0.0218511
352	mmu-miR-298	ACPP	0.608	-11832.8	0	-0.745059	7.05e-05	0.000361716
353	mmu-miR-298	AHNAK	0.607	-11758.6	0	-0.774704	2.18e-05	0.000168982
354	mmu-miR-298	PDLIM7	0.607	-12204.7	0	-0.644269	0.00118328	0.00249389
355	mmu-miR-298	RAB4B	0.606	-11742.9	0	-0.640316	0.00129255	0.00266174
356	mmu-miR-298	NIPAL2	0.606	-11742.9	0	-0.664032	0.00074631	0.00175887
357	mmu-miR-298	ADAMTSL2	0.606	-11742.9	0	-0.711462	0.000210175	0.000724213
358	mmu-miR-298	B3GALT1	0.606	-11742.9	0	-0.804348	5.19e-06	7.31e-05
359	mmu-miR-298	TSC22D4	0.606	-11742.9	0	-0.810277	3.85e-06	6.46e-05
360	mmu-miR-298	ASS1	0.606	-11996.5	0	-0.683794	0.000454022	0.00122945
361	mmu-miR-298	CNTN4	0.6055	-12027.2	0	-0.483202	0.0206982	0.0253736
362	mmu-miR-298	RASL12	0.605	-12055.8	0	-0.556324	0.00663468	0.00959652
363	mmu-miR-298	ATP8B1	0.605	-12055.8	0	-0.571146	0.0051179	0.00777988
364	mmu-miR-298	SDR42E1	0.605	-12055.8	0	-0.614625	0.00223208	0.00403043
365	mmu-miR-298	EIF2AK2	0.605	-12055.8	0	-0.68083	0.000490412	0.00129962
366	mmu-miR-298	PDGFA	0.605	-12055.8	0	-0.598814	0.00305681	0.00515404
367	mmu-miR-298	PDGFA	0.605	-12055.8	0	-0.629447	0.00163795	0.00318106
368	mmu-miR-298	RARG	0.605	-12055.8	0	-0.759881	4.04e-05	0.00025369
369	mmu-miR-298	SLC6A3	0.604	-11934.5	0	-0.68083	0.000490412	0.00129962
370	mmu-miR-298	RIT1	0.604	-11934.5	0	-0.748024	6.33e-05	0.000336919
371	mmu-miR-298	COL4A3	0.604	-11732.3	0	-0.582016	0.00420078	0.00664423
372	mmu-miR-298	ABHD5	0.604	-11969.6	0	-0.634387	0.00147238	0.00293986
373	mmu-miR-298	RAB15	0.604	-11969.6	0	-0.761858	3.73e-05	0.0002413
374	mmu-miR-298	RAMP1	0.604	-11969.6	0	-0.780632	1.67e-05	0.000144213
375	mmu-miR-298	NDST3	0.604	-12720.7	0	-0.663043	0.000764326	0.00178946
376	mmu-miR-298	PDE4D	0.6035	-12041	0	-0.702569	0.00027212	0.000859933
377	mmu-miR-298	CP	0.602	-12742.7	0	-0.740119	8.39e-05	0.000404006
378	mmu-miR-298	HRH3	0.6005	-12691.1	0	-0.574111	0.00485254	0.00746361
379	mmu-miR-298	EFHC1	0.6	-12088.8	0	-0.655138	0.000922116	0.0020619
380	mmu-miR-298	PPP4R4	0.6	-12742.7	0	-0.811265	3.67e-06	6.24e-05
381	mmu-miR-298	STX3	0.6	-12088.8	0	-0.802372	5.74e-06	7.59e-05
382	mmu-miR-298	TMEM104	0.6	-12088.8	0	-0.730237	0.000117082	0.000494594
383	mmu-miR-298	RGS4	0.6	-12088.8	0	-0.613636	0.00227743	0.00409434
384	mmu-miR-298	CORO7	0.6	-12088.8	0	-0.708498	0.000229355	0.000765334
385	mmu-miR-298	TMTC1	0.6	-12088.8	0	-0.73419	0.000102708	0.000455801
386	mmu-miR-298	AKAP13	0.6	-12088.8	0	-0.716403	0.00018118	0.000655218
387	mmu-miR-298	LTK	0.5985	-12743.7	0	-0.693676	0.000348635	0.00102197
388	mmu-miR-298	FAM83H	0.5975	-12095.3	0	-0.576087	0.00468214	0.00725722
389	mmu-miR-298	SYN2	0.5975	-12095.3	0	-0.650198	0.00103404	0.00224224
390	mmu-miR-298	SFXN3	0.5975	-12095.3	0	-0.482213	0.0209885	0.0256609
391	mmu-miR-298	RAB27B	0.5965	-12067.3	0	-0.742095	7.83e-05	0.000386831
392	mmu-miR-298	TRPM3	0.5965	-11572	0	-0.748024	6.33e-05	0.000336919
393	mmu-miR-298	POLR3G	0.596	-12708.8	0	-0.664032	0.00074631	0.00175887
394	mmu-miR-298	CAMK2A	0.595	-12727.6	0	-0.591897	0.00349107	0.00572565
395	mmu-miR-298	GDA	0.5945	-12039.5	0	-0.606719	0.00261715	0.00456032
396	mmu-miR-298	PAPPA2	0.5885	-11523.5	0	-0.494071	0.0177167	0.0221175
397	mmu-miR-298	CDC14B	0.588	-12692.7	0	-0.694664	0.000339333	0.0010026
398	mmu-miR-298	FBLN7	0.585	-11823	0	-0.650198	0.00103404	0.00224224
399	mmu-miR-298	NAPEPLD	0.584	-12716.8	0	-0.701581	0.000279856	0.000876582
400	mmu-miR-298	UHMK1	0.5815	-11806.6	0	-0.787549	1.2e-05	0.000115816
401	mmu-miR-298	TNFRSF9	0.581	-12163.8	0	-0.628458	0.00167288	0.00323443
402	mmu-miR-298	CAPN5	0.5775	-12065.3	0	-0.657115	0.000880303	0.00199177
403	mmu-miR-298	ZEB2	0.573	-11563.1	0	-0.708498	0.000229355	0.000765334
404	mmu-miR-298	PIGK	0.572	-11951.8	0	-0.690711	0.000377832	0.0010812
405	mmu-miR-298	GPM6B	0.5685	-12304.5	0	-0.725296	0.000137354	0.000546272
406	mmu-miR-298	ZBTB7B	0.567	-11524.2	0	-0.833004	1.76e-06	5.95e-05
407	mmu-miR-298	CDK14	0.567	-11286.6	0	-0.554348	0.00686275	0.00986796
408	mmu-miR-298	BCAM	0.566	-12217.6	0	-0.823123	2.21e-06	5.95e-05
409	mmu-miR-298	ANTXR2	0.565	-11855.4	0	-0.737154	9.29e-05	0.000429909
410	mmu-miR-298	LGALS8	0.564	-12099.8	0	-0.778656	1.83e-05	0.000151926
411	mmu-miR-298	GRIA1	0.563	-11581.7	0	-0.593874	0.00336201	0.00555595
412	mmu-miR-298	TMEM56	0.5625	-12295.6	0	-0.784585	1.39e-05	0.000128046
413	mmu-miR-298	SORBS1	0.5625	-12295.6	0	-0.724308	0.000141739	0.000556906
414	mmu-miR-298	COL4A4	0.5625	-12272.7	0	-0.55336	0.00697922	0.0100115
415	mmu-miR-298	PDE11A	0.561	-11343.3	0	-0.718379	0.000170556	0.000629021
416	mmu-miR-298	FOXO1	0.5565	-11257.3	0	-0.80336	5.46e-06	7.44e-05
417	mmu-miR-298	SEMA3E	0.5565	-11257.3	0	-0.785573	1.32e-05	0.000123947
418	mmu-miR-298	AHCYL2	0.556	-11432	0	-0.531621	0.00999245	0.0135059
419	mmu-miR-298	RGS7BP	0.5555	-12096.8	0	-0.681818	0.000478019	0.00127761
420	mmu-miR-298	CALR3	0.5535	-12192.5	0	-0.630435	0.00160363	0.00312607
421	mmu-miR-298	CAMK2A	0.5525	-11992.2	0	-0.621542	0.00193549	0.00361776
422	mmu-miR-298	PODN	0.552	-12130.7	0	-0.478261	0.0221829	0.0269484
423	mmu-miR-298	SRXN1	0.552	-12118.5	0	-0.620553	0.0019757	0.00367271
424	mmu-miR-298	LDLR	0.55	-12201.6	0	-0.623518	0.00185714	0.00350568
425	mmu-miR-298	CHDH	0.5475	-12733.1	0	-0.712451	0.000204086	0.000710439
426	mmu-miR-298	RASD2	0.5435	-12736.6	0	-0.570158	0.00520901	0.00789688
427	mmu-miR-298	RAB3D	0.5425	-11176.6	0.0001	-0.799407	6.68e-06	8.27e-05
428	mmu-miR-298	VCL	0.542	-11253.8	0.0001	-0.537549	0.00907981	0.012473
429	mmu-miR-298	MUSTN1	0.54	-13675.5	0.0002	-0.522727	0.0115036	0.0152477
430	mmu-miR-298	ARHGEF6	0.54	-11133.4	0.0002	-0.681818	0.000478019	0.00127761
431	mmu-miR-298	PCP4L1	0.54	-11137.5	0.0002	-0.6917	0.00036788	0.0010601
432	mmu-miR-298	ABLIM1	0.539	-10879.2	0.0002	-0.497036	0.0169678	0.0213086
433	mmu-miR-298	AMIGO2	0.5375	-11025.6	0.0004	-0.76581	3.18e-05	0.000215677
434	mmu-miR-298	TMEM106B	0.536	-11355.7	0.0006	-0.75	5.89e-05	0.000322111
435	mmu-miR-298	NDRG4	0.5355	-11233	0.0007	-0.730237	0.000117082	0.000494594
436	mmu-miR-298	SCN2B	0.5345	-11275.5	0.0009	-0.736166	9.61e-05	0.000439141
437	mmu-miR-298	KCNC4	0.5345	-11275.5	0.0009	-0.83004	1.84e-06	5.95e-05
438	mmu-miR-298	UNC13A	0.526	-11129.9	0.0094	-0.674901	0.000570581	0.00144964
439	mmu-miR-298	SCARA5	0.521	-12225.5	0.0287	-0.708498	0.000229355	0.000765334
440	mmu-miR-298	STXBP5L	0.5205	-11040.2	0.0317	-0.660079	0.000820588	0.00189171
441	mmu-miR-344	PURA	0.524	-12290.7	0.015	-0.513834	0.0131995	0.0171438
442	mmu-miR-375	PLBD2	0.6935	-16055.4	0	-0.773715	2.27e-05	0.000174208
443	mmu-miR-375	MRGPRF	0.6895	-12732.2	0	-0.701581	0.000279856	0.000876582
444	mmu-miR-375	SLC46A1	0.6895	-16125.5	0	-0.832016	1.78e-06	5.95e-05
445	mmu-miR-375	KCNQ3	0.6845	-12729.3	0	-0.688735	0.000398414	0.0011192
446	mmu-miR-375	PSD3	0.6095	-12729.5	0	-0.700593	0.000287775	0.000895643
447	mmu-miR-375	LSAMP	0.609	-12729.5	0	-0.566206	0.00558721	0.00837118
448	mmu-miR-375	CREB3L2	0.57	-12735.8	0	-0.647233	0.00110654	0.00236273
449	mmu-miR-375	CDH10	0.57	-12735.8	0	-0.658103	0.000860004	0.00195774
450	mmu-miR-375	PDE11A	0.562	-12785.5	0	-0.626482	0.00174464	0.0033393
451	mmu-miR-375	CASZ1	0.5565	-12769.4	0	-0.730237	0.000117082	0.000494594
452	mmu-miR-375	SLC35F1	0.556	-12769.4	0	-0.659091	0.000840101	0.00191971
453	mmu-miR-375	SHC3	0.5525	-12740.4	0	-0.804348	5.19e-06	7.31e-05
454	mmu-miR-375	PMP22	0.552	-12740.4	0	-0.855731	2.03e-06	5.95e-05
455	mmu-miR-375	DBC1	0.552	-12740.4	0	-0.677866	0.000529221	0.00137358
456	mmu-miR-375	RAB3B	0.552	-12740.4	0	-0.726285	0.000133083	0.000535553
457	mmu-miR-375	FMN1	0.552	-12740.4	0	-0.839921	1.71e-06	5.95e-05
458	mmu-miR-375	SNTB1	0.547	-12773.2	0	-0.636364	0.00141023	0.00284705
459	mmu-miR-574-3p	ELAVL1	0.686	-12729.3	0	-0.719368	0.000165442	0.000616854
460	mmu-miR-574-3p	RRP15	0.6845	-12729.3	0	-0.718379	0.000170556	0.000629021
461	mmu-miR-574-3p	EDARADD	0.6805	-12784.4	0	-0.791502	9.94e-06	0.000103129
462	mmu-miR-574-3p	CREBZF	0.5945	-12737	0	-0.636364	0.00141023	0.00284705
463	mmu-miR-574-3p	PHOX2B	0.577	-17554.9	0	-0.729249	0.000120924	0.000504282
464	mmu-miR-574-3p	KALRN	0.576	-17594.6	0	-0.738142	8.98e-05	0.000419847
465	mmu-miR-574-3p	PLEKHA5	0.57	-12735.8	0	-0.733202	0.000106157	0.000462181
466	mmu-miR-574-3p	KCTD15	0.57	-12735.8	0	-0.692688	0.000358149	0.00103972
467	mmu-miR-574-3p	HLF	0.5635	-12750.2	0	-0.837945	1.71e-06	5.95e-05
468	mmu-miR-574-3p	SFPQ	0.5635	-12750.2	0	-0.807312	4.46e-06	6.68e-05
469	mmu-miR-574-3p	SLX4	0.562	-12785.5	0	-0.686759	0.000419928	0.00116127
470	mmu-miR-574-3p	MICALCL	0.5595	-12752.4	0	-0.73419	0.000102708	0.000455801
471	mmu-miR-574-3p	MXD3	0.556	-12769.4	0	-0.813241	3.34e-06	5.98e-05
472	mmu-miR-574-3p	H2AFJ	0.556	-12769.4	0	-0.787549	1.2e-05	0.000115816
473	mmu-miR-574-3p	SENP1	0.552	-12740.4	0	-0.670949	0.00062993	0.00155936
474	mmu-miR-574-3p	CLSPN	0.552	-12740.4	0	-0.774704	2.18e-05	0.000168982
475	mmu-miR-574-3p	TDG	0.552	-12740.4	0	-0.712451	0.000204086	0.000710439
476	mmu-miR-574-3p	WDR3	0.547	-12773.2	0	-0.609684	0.00246666	0.00436131
477	mmu-miR-676	DLGAP2	1	-12725.7	0	-0.817194	2.79e-06	5.95e-05
478	mmu-miR-676	NKAIN1	0.6895	-12732.2	0	-0.809289	4.04e-06	6.46e-05
479	mmu-miR-676	DLGAP2	0.6895	-12732.2	0	-0.796443	7.76e-06	8.98e-05
480	mmu-miR-676	NME1	0.6895	-12732.2	0	-0.746047	6.8e-05	0.000352113
481	mmu-miR-676	NSL1	0.6845	-12729.3	0	-0.791502	9.94e-06	0.000103129
482	mmu-miR-676	LRP8	0.6685	-12736.8	0	-0.73419	0.000102708	0.000455801
483	mmu-miR-676	TGFBR1	0.601	-17367.1	0	-0.741107	8.11e-05	0.000394964
484	mmu-miR-676	HIPK2	0.595	-12737	0	-0.766798	3.05e-05	0.000211636
485	mmu-miR-676	AIF1L	0.574	-17587.6	0	-0.790514	1.04e-05	0.000106987
486	mmu-miR-676	PDE4D	0.57	-17876.2	0	-0.749012	6.11e-05	0.000330123
487	mmu-miR-676	KCTD15	0.57	-12735.8	0	-0.750988	5.68e-05	0.000315606
488	mmu-miR-676	MDM1	0.5635	-12750.2	0	-0.643281	0.00120984	0.00253346
489	mmu-miR-676	CAND2	0.56	-12796	0	-0.874506	2.66e-06	5.95e-05
490	mmu-miR-676	TCF3	0.5595	-12752.4	0	-0.756917	4.53e-05	0.000273223
491	mmu-miR-676	UBN2	0.558	-12742.5	0	-0.481225	0.021282	0.0259873
492	mmu-miR-676	NSL1	0.556	-12769.4	0	-0.827075	1.97e-06	5.95e-05
493	mmu-miR-676	TNRC6A	0.552	-12740.4	0	-0.698617	0.000304176	0.000931845
494	mmu-miR-676	TDG	0.552	-12740.4	0	-0.752964	5.27e-05	0.000300146
495	mmu-miR-676	CHRNA7	0.5295	-18388.4	0.0039	-0.724308	0.000141739	0.000556906
496	mmu-miR-676	TMEM201	0.5205	-12784.8	0.0317	-0.694664	0.000339333	0.0010026
497	mmu-miR-709	PLEKHO2	0.6895	-12732.2	0	-0.599802	0.00299866	0.00507791
498	mmu-miR-709	SLC46A1	0.6895	-16125.5	0	-0.490119	0.0187571	0.0232862
499	mmu-miR-709	ACE	0.6845	-12729.3	0	-0.598814	0.00305681	0.00515404
500	mmu-miR-709	LAYN	0.6845	-12729.3	0	-0.642292	0.0012369	0.00257838
501	mmu-miR-709	KCNQ3	0.6845	-12729.3	0	-0.743083	7.56e-05	0.000380811
502	mmu-miR-709	ATP2B4	0.6845	-12729.3	0	-0.682806	0.000465891	0.00125463
503	mmu-miR-709	RHOF	0.6845	-12729.3	0	-0.587945	0.00376175	0.00606647
504	mmu-miR-709	PSD3	0.6095	-12729.5	0	-0.727273	0.000128923	0.000525029
505	mmu-miR-709	LSAMP	0.609	-12729.5	0	-0.517787	0.0124219	0.0162826
506	mmu-miR-709	SH2B3	0.574	-17587.6	0	-0.554348	0.00686275	0.00986796
507	mmu-miR-709	ISLR	0.57	-12735.8	0	-0.550395	0.0073386	0.0104294
508	mmu-miR-709	P2RY2	0.57	-12735.8	0	-0.586957	0.00383212	0.00615581
509	mmu-miR-709	ITFG3	0.5635	-12750.2	0	-0.600791	0.00294145	0.00500271
510	mmu-miR-709	PDE11A	0.562	-12785.5	0	-0.56917	0.00530149	0.00800756
511	mmu-miR-709	PEAR1	0.5595	-12752.4	0	-0.62253	0.00189597	0.00356007
512	mmu-miR-709	TNXB	0.5595	-12752.4	0	-0.585968	0.00390359	0.00624494
513	mmu-miR-709	TTPAL	0.558	-12742.5	0	-0.550395	0.0073386	0.0104294
514	mmu-miR-709	KIF1C	0.558	-12742.5	0	-0.444664	0.0347409	0.040444
515	mmu-miR-709	C1QTNF7	0.558	-12742.5	0	-0.554348	0.00686275	0.00986796
516	mmu-miR-709	CASZ1	0.5565	-12769.4	0	-0.639328	0.00132117	0.00270286
517	mmu-miR-709	NETO1	0.556	-12769.4	0	-0.610672	0.00241815	0.00429693
518	mmu-miR-709	PHYHIP	0.556	-12769.4	0	-0.519763	0.0120475	0.0158691
519	mmu-miR-709	DYSF	0.556	-12769.4	0	-0.601779	0.00288516	0.00492735
520	mmu-miR-709	FABP3	0.556	-12769.4	0	-0.532609	0.00983525	0.0133349
521	mmu-miR-709	FABP3	0.556	-12769.4	0	-0.570158	0.00520901	0.00789688
522	mmu-miR-709	PARVA	0.556	-12769.4	0	-0.559289	0.00630449	0.00920927
523	mmu-miR-709	LAYN	0.5555	-12784.6	0	-0.531621	0.00999245	0.0135059
524	mmu-miR-709	C1QTNF1	0.5545	-12757.5	0	-0.58498	0.00397617	0.00634288
525	mmu-miR-709	IGSF11	0.554	-17927.1	0	-0.624506	0.00181898	0.00344864
526	mmu-miR-709	SHC3	0.5525	-12740.4	0	-0.560277	0.00619754	0.00908701
527	mmu-miR-709	MGLL	0.5525	-12740.4	0	-0.503953	0.0153213	0.0195296
528	mmu-miR-709	SLC7A8	0.552	-12740.4	0	-0.592885	0.00342603	0.00563553
529	mmu-miR-709	SNX21	0.552	-12740.4	0	-0.620553	0.0019757	0.00367271
530	mmu-miR-709	SLC35F3	0.552	-12740.4	0	-0.572134	0.00502812	0.00767626
531	mmu-miR-709	SLC35F3	0.552	-12740.4	0	-0.608696	0.00251599	0.00442949
532	mmu-miR-709	CAPN5	0.552	-12740.4	0	-0.575099	0.0047667	0.00734893
533	mmu-miR-709	NAPB	0.552	-12740.4	0	-0.66502	0.000728653	0.00172715
534	mmu-miR-709	CAPN5	0.552	-12740.4	0	-0.604743	0.00272172	0.00470268
535	mmu-miR-709	CHRM2	0.552	-12740.4	0	-0.56917	0.00530149	0.00800756
536	mmu-miR-709	SYN1	0.552	-12740.4	0	-0.571146	0.0051179	0.00777988
537	mmu-miR-709	RAB3B	0.552	-12740.4	0	-0.535573	0.00937597	0.0128078
538	mmu-miR-709	FMN1	0.552	-12740.4	0	-0.564229	0.00578478	0.00860287
539	mmu-miR-709	PWWP2B	0.552	-12740.4	0	-0.514822	0.0130015	0.0169259
540	mmu-miR-709	SNTB1	0.547	-12773.2	0	-0.455534	0.030173	0.0355285
541	mmu-miR-709	SMAD9	0.5285	-12792.4	0.0051	-0.552372	0.00709734	0.0101567
542	mmu-miR-93	SYNM	0.5605	-12787.1	0	-0.702569	0.00027212	0.000859933
543	mmu-miR-93	FMN1	0.552	-12740.4	0	-0.694664	0.000339333	0.0010026

## Sheet: Supplementary Table 2-2
	miR.106a	miR.106b	miR.135a	miR.135b	miR.148a	miR.17	miR.18a	miR.19a	miR.19b	miR.204	miR.20a	miR.25	miR.375	miR.574	miR.93	Type
neuroblastA	-1.41049	-1.0219	-1.24387	-3.02332	-0.180347	-0.940676	-0.786583	1.02123	0.544951	2.64639	-0.899772	-2.37576	0.812521	1.53892	-1.83545	neuroblast
neuroblastA2	-0.915411	-1.66497	-1.71293	-5.04245	-1.31821	NA	-0.660318	-0.281916	-0.392514	3.32271	-1.77075	-2.99762	0.613451	0.340113	-1.6826	neuroblast
neuroblastB	-1.99186	-1.22634	-2.38301	-3.09064	-0.50069	-1.14448	-1.29974	1.46243	0.809965	2.98284	-1.50945	-2.74186	-0.270709	2.15861	-2.47017	neuroblast
neuroblastC	-1.63098	-0.987167	-2.55873	-3.29395	-0.0386435	-0.740323	-1.27009	0.823018	0.111474	2.97255	-1.28263	-2.16297	0.404041	3.09663	-2.16237	neuroblast
neuroblastC2	-1.87038	-0.477473	-2.59869	-3.86037	-0.852629	-0.716842	-0.86113	1.01251	0.325585	3.85724	-1.46384	-2.4547	0.677651	3.06075	-2.83805	neuroblast
neuroblastD	-1.65084	-0.305119	-1.14012	-3.92995	0.288376	-0.869403	-0.961697	1.34863	0.25519	3.62104	-1.02535	-1.80661	0.239309	1.87683	-1.8269	neuroblast
neuroblastD2	-2.23037	-1.02583	-2.3737	-4.88676	-0.637307	-1.27749	-1.91922	0.823032	-0.146883	3.93664	-1.96125	-2.76298	-0.209135	3.09362	-3.11892	neuroblast
X_106_SD	1.00494	0.341391	-0.456617	-1.28455	-1.88561	0.718285	0.59203	0.184679	0.383752	-0.481165	1.03432	0.753946	0.872227	0.779113	0.547445	tumour_AMP
X_13_SD	1.43681	0.471352	-0.725947	0.342516	-1.12261	1.48859	1.80933	1.56871	1.54101	1.24057	1.60952	0.667641	-1.86282	0.0331826	0.901791	tumour_AMP
X_14_SD	0.888811	0.0627412	-0.341908	-2.50606	-2.23521	0.0839692	-0.455934	0.73368	1.33789	-4.25726	1.09182	0.685564	-5.12144	-0.635216	0.574058	tumour_AMP
X_15_SD	0.164883	-0.102795	-1.40684	-4.76079	-2.85072	0.39967	0.69948	0.773738	1.2518	-1.84015	0.512901	0.173372	0.740498	0.234273	-0.288099	tumour_AMP
X_17_SD	-0.764155	0.01165	-0.86549	-1.10692	-0.0965819	-0.73316	-0.727402	0.185194	-0.390488	-0.896123	-0.38308	0.590105	3.14584	0.848123	-0.0662791	tumour_AMP
X_19_SD	0.803679	0.883058	2.88666	1.87495	-2.51302	1.19199	0.733839	1.35513	1.24855	-1.00782	1.8228	0.990702	0.213948	-2.86365	1.2476	tumour_AMP
X_32_SD	0.478646	0.0357731	-0.17359	1.67485	-2.62824	0.681449	0.542565	0.77023	1.5289	-2.15728	0.963426	0.293028	2.11346	-0.306421	0.0844845	tumour_AMP
X_33_SD	0.231626	0.251706	-1.84771	-3.3187	0.393672	0.545019	0.784884	0.343704	0.589072	-3.23075	0.572243	1.09528	2.89073	-1.66234	0.442078	tumour_AMP
X_38_SD	0.461858	0.688096	-0.0773806	3.03267	0.021159	-0.471021	0.475667	-0.282295	0.208013	-2.18368	0.454745	1.03971	3.79587	0.259014	0.850126	tumour_AMP
X_39_SD	0.581088	0.918044	-2.43713	0.902796	0.571016	-0.0930464	1.35656	0.274549	0.451763	-5.26406	0.440059	0.853561	4.12473	0.660096	0.557263	tumour_AMP
X_40_SD	2.93738	1.83062	2.30062	2.52835	0.0705464	3.05189	3.79164	2.97272	2.79602	0.257062	3.21051	1.57109	2.79467	-2.24111	2.15575	tumour_AMP
X_42_SD	0.531234	-0.270972	-3.30622	-0.532569	-0.152829	0.526498	1.13672	0.33605	0.252624	-3.04213	0.735923	0.197416	0.118152	1.35076	0.428785	tumour_AMP
X_44_SD	1.88438	0.738123	0.984742	-1.65302	-4.0816	1.74162	0.754041	1.95037	1.37543	-0.504178	2.19857	1.56205	-3.12999	-3.13947	1.20935	tumour_AMP
X_46_SD	0.379315	0.739755	0.535187	0.48345	-0.157878	0.27816	0.202666	0.806658	0.337052	-1.36144	0.479797	1.07967	2.50882	-0.698084	0.484922	tumour_AMP
X_47_SD	1.02771	1.0089	-0.7729	2.56438	-3.33162	1.12194	1.88047	1.04969	0.921516	-2.3155	1.45891	0.670869	-1.1131	-2.02371	0.966708	tumour_AMP
X_66_SD	1.05074	0.674276	0.976168	-2.31207	-2.67493	1.01033	0.672439	0.543623	0.475887	-1.59437	1.62569	1.41932	-0.656635	-3.63023	1.48842	tumour_AMP
X_78_SD	1.53752	1.37293	2.05823	-2.72961	-0.777447	1.70428	0.935784	2.19195	1.85574	-0.343937	2.22978	1.7865	-1.279	-0.464659	1.71812	tumour_AMP
X_82_SD	0.182313	0.26084	-2.96988	-0.632945	0.827544	-0.0325129	0.741653	0.226099	-0.2176	0.197028	0.358838	0.494983	2.19307	0.475311	0.592963	tumour_AMP
X_90_SD	0.262149	0.556229	1.21656	2.06093	-1.17898	0.235091	0.0808199	0.0553687	0.00617308	-0.174028	0.635738	1.31501	-1.20234	-0.113986	0.90289	tumour_AMP
X_93_SD	1.00804	1.29131	-1.06907	-2.83545	-2.64948	0.84773	0.892999	0.938067	0.881644	-4.57378	0.822383	1.02486	2.52421	-0.916158	1.09337	tumour_AMP
